# Supplementary material for: Effects of cryopreservation on viability and functional stability of an industrially relevant alga
Source: PubMed Central journal article supplement (PMC6376116; doi:10.1038/s41598-019-38588-6), 2019-02-14
Supplement: 41598_2019_38588_MOESM1_ESM.pdf [file 41598_2019_38588_MOESM1_ESM.pdf]

# **Effects of cryopreservation on viability and functional stability of an industrially relevant alga**

**Rahul Vijay Kapoore<sup>1§</sup>, María Huete-Ortega<sup>1,3§</sup>, John G. Day<sup>2§</sup>, Katarzyna Okurowska<sup>1</sup>, Stephen P. Slocombe<sup>2</sup>, Michele S. Stanley<sup>2</sup> and Seetharaman Vaidyanathan<sup>1\*</sup>**

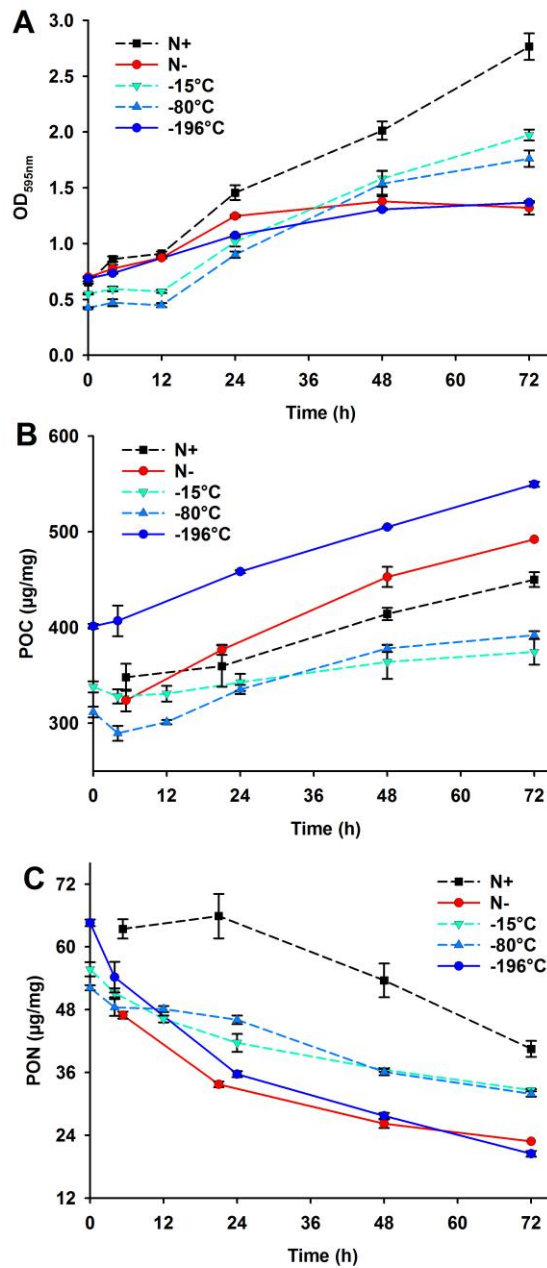

**Supplementary Figure S1.** Mean  $\pm$  standard error of A) optical density, B) particulate organic carbon (POC) and C) particulate organic nitrogen (PON) of the *C. vulgaris* in Phase 2 growth. -15°C treated (inverted turquoise triangle and dashed line), -80°C treated (pale blue triangle and dashed line) and -196°C treated (dark blue circle and straight line) populations are shown along with controls before cryopreservation treatments under nitrogen free conditions (N-, red circle and straight line) and nitrogen replete conditions (N+, black square and dashed line).
